# Supplementary material for: Spastin tethers lipid droplets to peroxisomes and directs fatty acid trafficking through ESCRT-III
Source: PubMed Central journal article supplement — J Cell Biol. 2019 Jun 21;218(8):2583–99. doi: 10.1083/jcb.201902061 (PMC6683741; doi:10.1083/jcb.201902061), 2019-06-21
Supplement: JCB_201902061_sm.pdf [file JCB_201902061_sm.pdf]

## Supplemental material

Chang et al., <https://doi.org/10.1083/jcb.201902061>

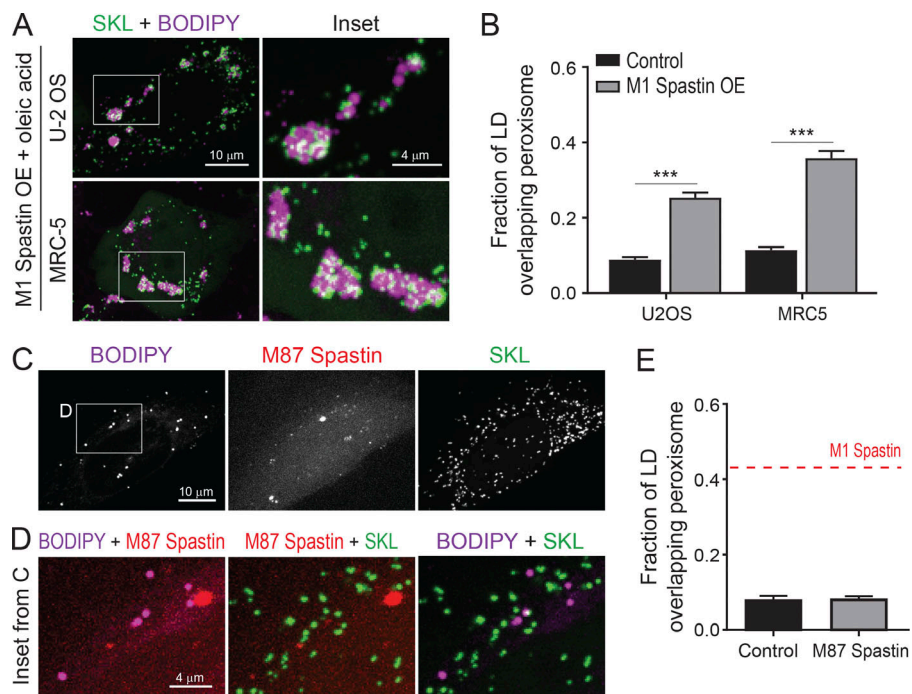

Figure S1. **M1 Spastin promotes LD-peroxisome contact formation in U2-OS and MRC-5 cells.** (A) Association between BODIPY-665/676-labeled LDs and mEmerald-SKL-labeled peroxisomes in U-2 OS (top) and MRC-5 (bottom) cells expressing mApple-M1 Spastin in the presence of 300  $\mu$ M oleic acid treatment. Representative confocal MIP images are shown. OE, overexpression. (B) Fraction of LD overlapping peroxisome as described in A. Means  $\pm$  SEM are shown (23–34 cells from three independent experiments). \*\*\*,  $P < 0.001$ . (C and D) Localization of BODIPY-665/676-labeled LDs and mEmerald-SKL-labeled peroxisomes in HeLa cells overexpressing mApple-M87 Spastin (C). Images from the inset (D). Representative confocal MIP images are shown. (E) Fraction of LD overlapping peroxisome in control and mApple-M87 Spastin-expressing HeLa cells. Red dashed line indicates the fraction of LD overlapping peroxisome as shown in Fig. 1 E. Means  $\pm$  SEM are shown (20–25 cells from three independent experiments).

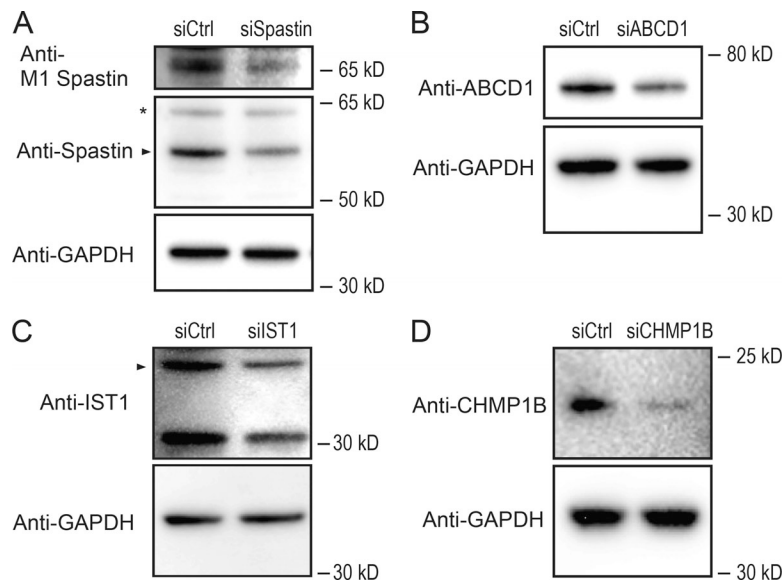

Figure S2. **Detecting endogenous protein levels following siRNA transfection.** **(A)** Endogenous Spastin protein levels detected by Western blotting using anti-M1 Spastin (top) and anti-Spastin (middle) antibodies in HeLa cells transfected with siCtrl or siSpastin. GAPDH protein levels serve as a loading control (bottom). Arrowhead and asterisk (middle panel) indicate M87 Spastin at expected molecular weight and a nonspecific band, respectively. **(B)** Endogenous ABCD1 protein levels detected by Western blotting using anti-ABCD1 antibody (top) in HeLa cells transfected with siCtrl or siABCD1. GAPDH protein levels serve as a loading control (bottom). **(C)** Endogenous IST1 protein levels detected by Western blotting using anti-IST1 antibody (top) in HeLa cells transfected with siCtrl or siIST1. Arrowhead (top panel) indicates IST1 at expected molecular weight. GAPDH protein levels serve as a loading control (bottom). **(D)** Endogenous CHMP1B protein levels detected by Western blotting using anti-CHMP1B antibody (top) in HeLa cells transfected with siCtrl or siCHMP1B. GAPDH protein levels serve as a loading control (bottom).

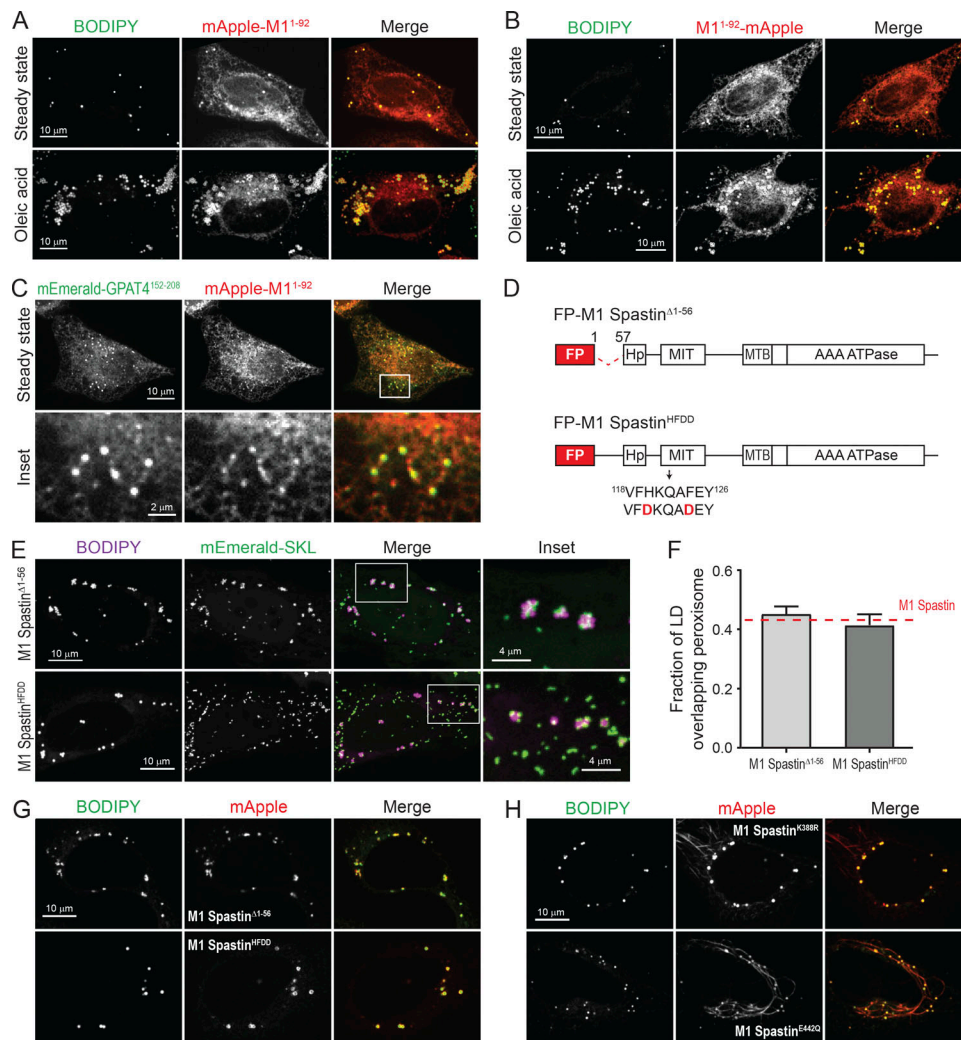

Figure S3. **Subcellular localization of M1 Spastin synthetic constructs and mutants respective to LDs and peroxisomes.** **(A and B)** Localization of mApple-M1<sup>1-92</sup> (A) and M1<sup>1-92</sup>-mApple (B) and BODIPY-493/503-labeled LDs in HeLa cells in steady state (top) or following 300  $\mu$ M oleic acid treatment for 16 h (bottom). Representative confocal images are shown. **(C)** mApple-M1<sup>1-92</sup> colocalizes with mEmerald-GPAT4<sup>152-208</sup> in steady-state HeLa cells. Representative confocal images are shown. **(D)** Diagrams of FP-M1 Spastin<sup>Δ1-56</sup> and FP-M1 Spastin<sup>HFDD</sup>. The red dashed line indicates domain deletion. Mutated residues are labeled in red. **(E)** The association between BODIPY-665/676-labeled LDs and mEmerald-SKL-labeled peroxisomes in HeLa cells expressing mApple-M1 Spastin<sup>Δ1-56</sup> or mApple-M1 Spastin<sup>HFDD</sup>. Representative confocal MIP images are shown. **(F)** Fraction of LD overlapping peroxisomes as described in E and in cells overexpressing mApple-M1 Spastin (red dashed line). Mean  $\pm$  SEM is shown (28–34 cells from three independent experiments). **(G)** Colocalization of BODIPY-665/676-labeled LDs and mApple-M1 Spastin<sup>Δ1-56</sup> or mApple-M1 Spastin<sup>HFDD</sup> in HeLa cells. Representative confocal images are shown. **(H)** Colocalization of BODIPY-665/676-labeled LDs and mApple-M1 Spastin<sup>K388R</sup> or mApple-M1 Spastin<sup>E442Q</sup> in HeLa cells. Representative confocal images are shown.

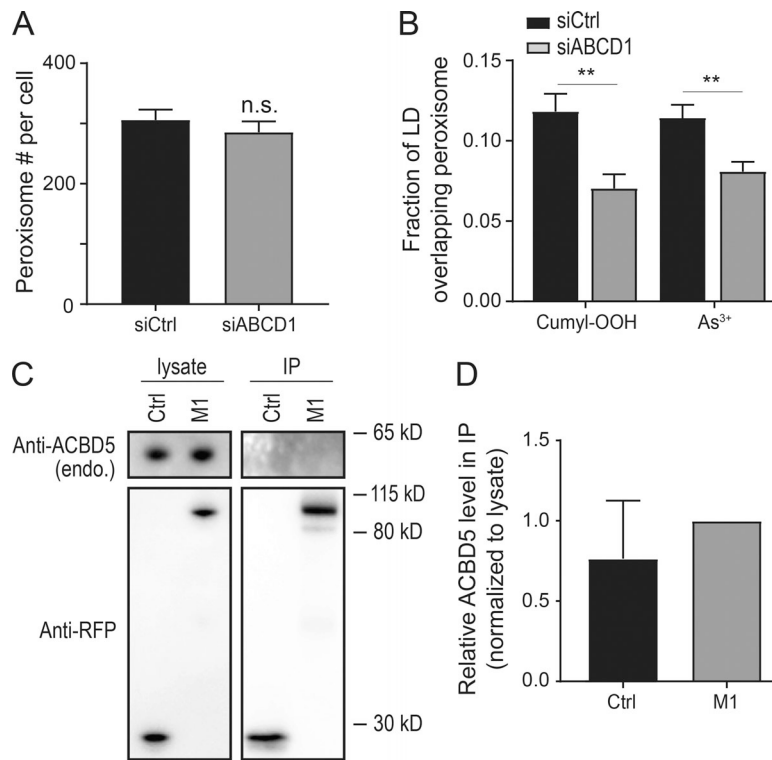

Figure S4. **ABCD1 supports LD-peroxisome contact formation.** **(A)** Number of mCherry-SKL-labeled peroxisome in HeLa cells transfected with siCtrl or siABCD1. Means  $\pm$  SEM are shown (30–32 cells from four independent experiments). n.s., not significant. **(B)** Fraction of BODIPY-665/676-labeled LD overlapping mEmerald-SKL-labeled peroxisome in siCtrl and siABCD1-transfected HeLa cells treated with cumyl-OOH or with As<sup>3+</sup> for 30 min. Means  $\pm$  SEM are shown (25–27 cells from three independent experiments). \*\*  $P < 0.01$ . **(C)** IP of ACBD5 in HeLa cells transfected with mApple-C1 vector (Ctrl) and mApple-M1 Spastin (M1). Protein levels of endogenous ACBD5 and overexpressed constructs assessed by Western blotting. **(D)** Quantification of relative ACBD5 levels in the IP as described in C. The value of M1 is set as 1. Means  $\pm$  SEM from five independent IP experiments are shown.

Table S1. **Oligonucleotide information**

| <b>Name</b>                           | <b>Sequence (5'-3')</b>                                              |
|---------------------------------------|----------------------------------------------------------------------|
| M1 Spastin F                          | ATATGAATTCTCCGGGTGGAC (EcoRI)                                        |
| M87 Spastin F                         | ATCGAATTCTATGGCAGCAAGAGGAGCT (EcoRI)                                 |
| Spastin R                             | ATCGGGATCCTTAACAGTGGTATCTCCAAAGTC (BamHI)                            |
| M1 Spastin <sup>M87A</sup> F          | TTCTCCCGCGCCCTCGCGGCAGCAAGAGGAGCTCC (mutagenesis)                    |
| M1 Spastin <sup>M87A</sup> R          | GCTCCTCTTGGCTGCCGCGAGGGCGCGGGAGAGCG (mutagenesis)                    |
| FP-M1 <sup>1-92</sup> F               | Same as M1 Spastin F                                                 |
| FP-M1 <sup>1-92</sup> R               | ATCGGGATCCTTAGCTCCTCTTGGCTGCCATG (BamHI)                             |
| M1 <sup>1-92</sup> -FP F              | ATCGAGATCTCACCATGAATTCTCCGGGTGGAC (BglII)                            |
| M1 <sup>1-92</sup> -FP R              | ATCGAAGCTTGTCTCTTGGCTGCCATG (HindIII)                                |
| 2xFKBP F                              | ATCGGCTAGCACCATGGGTGCTCTCGAGGGAGTGCA (NheI)                          |
| 2xFKBP R                              | ATCGACCGGTAGTGCCTGCCAGCTGA (AgeI)                                    |
| M1 Spastin <sup>K388R</sup> F         | CCACCTGGGAATGGGAGGACAATGCTGGCTAAAGCAG (mutagenesis)                  |
| M1 Spastin <sup>K388R</sup> R         | TTTAGCCAGCATTGTCTCCATTCCAGGTGGAC (mutagenesis)                       |
| M1 Spastin <sup>E442Q</sup> F         | ATAATTTTATAGATCAAGTTGATAGCCTTTTGTGT (mutagenesis)                    |
| M1 Spastin <sup>E442Q</sup> R         | AAAGGCTATCAACTTGATCTATAAAAATTATAGAAGGTTGAA (mutagenesis)             |
| M1 Spastin <sup>Δ1-56</sup> F         | ATCGGAATCTCTGTTTGTAGGCTTCGCG (EcoRI)                                 |
| M1 Spastin <sup>Δ1-56</sup> R         | Same as Spastin R                                                    |
| M1 Spastin <sup>HFDD</sup> F          | CGCGTCCGAGTCTTCGACAAACAGGCCGACGAGTACATCTCCATTGCCC (mutagenesis)      |
| M1 Spastin <sup>HFDD</sup> R          | AATGGAGATGTACTCGTCCGCTGTTTGTGCAAGACTCGGACGCGCTCG (mutagenesis)       |
| M1 <sup>1-92</sup> -197-328 (PXI) F   | GCAGCCAAGAGGAGCAAGATGCAACCAGTTTTGCC (In-Fusion cloning)              |
| M1 <sup>1-92</sup> -197-328 (PXI) R   | TTATCTAGATCCGGTGGATCCTTACTATATAAGGTTAGCAAGGTTGCT (In-Fusion cloning) |
| FP-197-328 (PXI) F                    | ATCGGAATCTAAGATGCAACCAGTTTTGCC (EcoRI)                               |
| FP-197-328 (PXI) R                    | ATCGGGATCCTTACTATATAAGGTTAGCAAGGTTGCT (BamHI)                        |
| GPAT <sup>4<sup>152-208</sup></sup> F | ATCGAATTCTAACTCCAGTACATCAGCCTT (EcoRI)                               |
| GPAT <sup>4<sup>152-208</sup></sup> R | ATCGGGATCCTTAGAACTCCTTAAACCTCCATT (BamHI)                            |
| IST1 F                                | ATCGGTGACCTGGGCTCTGGATTTAAAG (Sall)                                  |
| IST1 R                                | ATCGGTACCTATGTTTTCTTTTTCAGCTCTTC (KpnI)                              |
| CHMP1B F                              | ATCGGTGACTCTAACATGGAGAAACACCTG (Sall)                                |
| CHMP1B R                              | ATCGGTACCTCACACTTGATCCCGAAGG (KpnI)                                  |
| siControl F                           | TAATACGACTCACTATAGGGTTGCCTTCTGTTTTGCT                                |
| siControl R                           | TAATACGACTCACTATAGGGTTGCCGGAAGCTAGAGTAA                              |
| siSpastin F                           | TAATACGACTCACTATAGGGTTAAGGCCTTGCCTTGATG                              |
| siSpastin R                           | TAATACGACTCACTATAGGGTTAAGGCCTTGCCTTGATG                              |
| siABCD1 F                             | TAATACGACTCACTATAGGGTGGAGCCCAAAAGTCTACC                              |
| siABCD1 R                             | TAATACGACTCACTATAGGGGCTTGGTCAGGTTGGAGTA                              |
| siIST1 F                              | TAATACGACTCACTATAGGGCCAAAATCCTGGTGGAGAGA                             |
| siIST1 R                              | TAATACGACTCACTATAGGGTCCGGGAAAGATCATCAAAG                             |
| siCHMP1B F                            | TAATACGACTCACTATAGGGCCGCAAGAAGTACTGAGTAG                             |
| siCHMP1B R                            | TAATACGACTCACTATAGGGTACACTTGATCCCGAAGG                               |

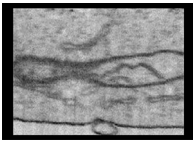

Video 1. **Volumetric LD-peroxisome contacts driven by M1 Spastin.** Animation of 3D rendering in Fig. 1 H. Video begins by sectioning through the z axis, then repeating with the annotated LDs (red) and peroxisomes (cyan), and once more with the 3D rendering of the LD and peroxisome segmentations. The 3D renderings are rocked about the x axis. A 360° rotation with all the encompassing organelles in the volume follows (green, mitochondria; blue, ER; gray, plasma membrane; purple, endosome; orange, multivesicular body). Bounding box is  $1.2 \times 1.2 \times 1.6 \mu\text{m}$ . Video frame rate, 25 frames per second.

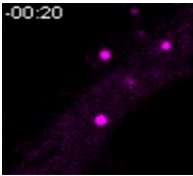

Video 2. **Dynamic association between LDs and peroxisomes.** Dynamic association of LDs (magenta) and peroxisomes (green) as described in Fig. 1 I. Acquisition rate, 20 s per frame; video frame rate, 5 frames per second.

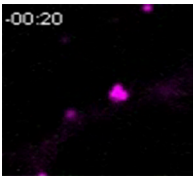

Video 3. **Stable association between LDs and peroxisomes mediated by M1 Spastin overexpression.** Stable association of LDs (magenta) and peroxisomes (green) in M1 Spastin-overexpressing HeLa cells as described in Fig. 1 I. Acquisition rate, 20 s per frame; video frame rate, 5 frames per second.

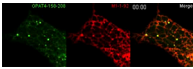

Video 4. **Dynamic association between M1<sup>1-92</sup> and GPAT4<sup>158-208</sup>.** Dynamic association of M1<sup>1-92</sup> (red) and GPAT4<sup>158-208</sup> (green) as described in Fig. S3 C. Confocal images of M1<sup>1-92</sup> and GPAT4<sup>158-208</sup> were acquired simultaneously. Acquisition rate, 5 s per frame; video frame rate, 6 frames per second.
